# Supplementary material for: Reversible activity changes of a lipid-coated lipase for enantioselective esterification in supercritical fluoroform
Source: Royal Society of Chemistry journal article supplement (doi:10.1039/b104913p), 2001-01-01
Supplement: b104913p.doc [file b104913p.doc]

**Table S1** Reaction rate, enantioselectivity, and conversion of esterification of 1-phenylethanol catalyzed by a lipid-coated lipase B both in scCHF3 and various organic solvents at 40 °C a

| Media Initial rates / M s-1 (mg of protein)-1 Enantioselectivity Conversion (%) |
| --- |
| *vR* *vS* *vR / vS* |
| scCHF3 with 60 atm 4.1 0.024 170 65  Isooctane 6.5 0.025 250 70  Benzene 2.0 0.011 190 65  Diisopropyl ether 0.95 0.009 100 20  Chloroform 0 0 -- 0  Tetrahydrofuran 0 0 -- 0 |

a [(*R*)- or (*S)*-1-phenylethanol] = 50 mM, [lauric acid] = 100 mM, [lipid-coated lipase B] = 1 mg of protein, in 10 mL of scCHF3 or organic solvents.
